# Supplementary material for: Comparing quantile regression forest and mixture density long short-term memory models for probabilistic post-processing of satellite precipitation-driven streamflow simulations
Source: Copernicus journal article supplement (doi:10.5194/hess-27-4529-2023), 2023-12-20
Supplement: Supplementary file 1 [file hess-27-4529-2023-supplement.zip]

Archive with 3 entries (3 files):
- Supplement.pdf
- hess-27-4529-2023-supplement-title-page.pdf
- Basin_Attr.xlsx
