# Supplementary material for: Comparing quantile regression forest and mixture density long short-term memory models for probabilistic post-processing of satellite precipitation-driven streamflow simulations
Source: Copernicus journal article supplement (doi:10.5194/hess-27-4529-2023), 2023-12-20
Supplement: Supplementary file 1 [file hess-27-4529-2023-supplement.zip › hess-27-4529-2023-supplement-title-page.pdf]

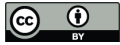

*Supplement of*

## **Comparing quantile regression forest and mixture density long short-term memory models for probabilistic post-processing of satellite precipitation-driven streamflow simulations**

**Yuhang Zhang et al.**

*Correspondence to:* Aizhong Ye (aeye@bnu.edu.cn)

- [hess-27-4529-2023-supplement-title-page.pdf](#)
- [Basin\\_Attr.xlsx](#)
- [Supplement.pdf](#)

The copyright of individual parts of the supplement might differ from the article licence.
